# Supplementary material
Source: HighWire-hosted journal article supplement (https://bmjopenquality.bmj.com/highwire/filestream/136143/field_highwire_adjunct_files/2/ds3777.xlsx)
Supplement: ds3777.xlsx [file ds3777.xlsx]

## Sheet: Questionnaire Results
Table 1	Q1. How easy is it to know who needs a weekend review?
		1	2	3	4	5		Q1. Percentage of people who scored 4 or 5
	Old system	0	1	6	6	1
	New system	0	0	0	8	6
	Old system %	0	7.14286	42.8571	42.8571	7.14286		50
	New system %	0	0	0	57.1429	42.8571		100
Table 2	Q2. How often is it written why patients need a review?
		1	2	3	4	5		Q2. Percentage of people who scored 4 or 5
	Old system	0	9	5	0	0
	New system	0	4	7	3	0
	Old system %	0	64.2857	35.7143	0	0		0
	New system %	0	28.5714	50	21.4286	0		21.4
Table 3	Q3. How often do you know which day you need to review the patient?
		1	2	3	4	5		Q3. Percentage of people who scored 4 or 5
	Old system	0	3	5	6	0
	New system	0	0	2	6	6
	Old system %	0	21.4286	35.7143	42.8571	0		42.9
	New system %	0	0	14.2857	42.8571	42.8571		85.7
Table 4	Q4. How often do you feel you are reviewing patients unnecessarily?
		1	2	3	4	5		Q4. Percentage of people who scored 4 or 5
	Old system	1	3	7	3	0
	New system	2	2	8	2	0
	Old system %	7.14286	21.4286	50	21.4286	0		21.4
	New system %	14.2857	14.2857	57.1429	14.2857	0		14.3
Table 5	Q5. How often do you feel a patient has not been reviewed who should have been?
		1	2	3	4	5		Q5. Percentage of people who scored 4 or 5
	Old system	1	2	7	3	1
	New system	1	6	5	2	0
	Old system %	7.14286	14.2857	50	21.4286	7.14286		28.6
	New system %	7.14286	42.8571	35.7143	14.2857	0		14.3
Table 6	Q6. How often do patients have clear weekend plans?
		1	2	3	4	5		Q6. Percentage of people who scored 4 or 5
	Old system	1	8	2	3	0
	New system	0	4	4	4	2
	Old system %	7.14286	57.1429	14.2857	21.4286	0		21.4
	New system %	0	28.5714	28.5714	28.5714	14.2857		28.6
Table 7	Q7. How often do you think unnecessary bloods are being done?
		1	2	3	4	5		Q7. Percentage of people who scored 4 or 5
	Old system	0	1	4	6	2
	New system	1	1	4	7	1
	Old system %	0	7.14286	28.5714	42.8571	14.2857		57.1
	New system %	7.14286	7.14286	28.5714	50	7.14286		57.1
Table 8	Q8. How often is it stated which day(s) patients need bloods checking?
		1	2	3	4	5		Q8. Percentage of people who scored 4 or 5
	Old system	0	0	5	7	1
	New system	0	0	0	4	7
	Old system %	0	0	38.4615	53.8462	7.69231		61.5
	New system %	0	0	0	36.3636	63.6364		100
Table 9	Q9. How happy are you with the current handover system?
		1	2	3	4	5		Q9.Percentage of people who scored 4 or 5
	Old system	1	8	4	1	0
	New system	0	0	2	11	1
	Old system %	7.14286	57.1429	28.5714	7.14286	0		7.1
	New system %	0	0	14.2857	78.5714	7.14286		85.7

## Sheet: Time taken to find patient
Time taken to locate a patient on the weekend list
	Pre-intervention	After PDSA cycle 1	Post-intervention
	20	2	2
	16	15	2
	17	16	2
	20	15	10
	21	14	4
	25	14	5
	35	18	6
	3	15	3
	25	15	7
	23	16	3
	21	14	3
	19	16	4
	20	17	4
	22	16	5
	19	15	2
	20	14	2
	15	16	3
	30	17	4
	23	14	5
	22	25	2
Average Time	20.8	15.2	3.9
SD	6.20356	3.94168	2.04939
95% HI	32.959	22.9257	7.9168
95% LO	8.64101	7.47431	-0.116805
Average Time	20.5802	15.2771	3.78747

## Sheet: Time taken making weekend list
Table 10	How do you spend compiling a list of jobs at the weekend?
	Time	0-5 mins	5-10 mins	10-12 mins	13-15 mins	15-20 mins	20-30 mins	30-40 mins	> 40 mins
	Pre-intervention						1	7	1
	Post PDSA cycle 1		1	1	5	1
	Post PDSA cycle 2		3	6
	Post PDSA cycle 4	10
Table 11	How long does it take you to copy your patients onto the weekend list?
	Time	0-5 mins	5-10 mins	10-12 mins	13-15 mins	15-20 mins	20-30 mins	30-40 mins	> 40 mins
	Old team lists			1	2	8
	New team lists	11
